# Supplementary material
Source: HighWire-hosted journal article supplement (https://bmjopen.bmj.com/content/10/9/e035539)
Supplement: inline-supplementary-material-1 [file inline-supplementary-material-1.pdf]

No. ☐ ☐

## Interview Questions

### Part 1 – Personal information

1. Name: \_\_\_\_\_
2. Gender: \_\_\_\_\_
3. Age: \_\_\_\_\_
4. Age for registration as a body donation volunteer: \_\_\_\_\_
5. Education level: \_\_\_\_\_
6. Occupation: \_\_\_\_\_
7. Working status: \_\_\_\_\_ (Retired/Still at work)

### Part 2 – Motivation-related information

8. How did you learn about body donation and the Friends of Voluntary Body Donors (FVBD) organization?
  - ☐ Through public channels
  - ☐ I already knew something about it
  - ☐ I came up with the idea of donation and went to look for an organization
  - ☐ Other channels (more specific answer)

Answer: \_\_\_\_\_

9. Why did you decide to donate your body? (Motivation for body donation before registration.)

Have you ever had thoughts about “wanting to donate” before you reached out to Friends of Voluntary Body Donors (FVBD)? If the answer is “yes”, then when did you begin to think about donation?

- ☐ To support medical education
- ☐ To contribute to medical science research
- ☐ To be a useful person; To help others (To help others)
- ☐ In opposition to complex funerals
- ☐ Due to lack of kinship (Perhaps no one can help with the funeral)
- ☐ Medical education background
- ☐ To reduce the burden of funeral expenses on future generations (Funeral expenses

No. ☐ ☐

and cemetery expenses are high)

- ☐ Dead bodies are otherwise useless
- ☐ No longer holding a traditional Chinese outlook of life and death
- ☐ To be remembered by future generations
- ☐ To save land resources
- ☐ Opposition to cremation
- ☐ To follow the example set by other donors (role models)
- ☐ Being inspired by publicity about body donation
- ☐ Having seen relatives or friends who donated their bodies (inspiration)
- ☐ Other

Answer: \_\_\_\_\_

10. Did you know any detailed information about your donation before registering?

Answer: \_\_\_\_\_

\*Interviewers should remind interviewees of this problem, including the whereabouts and use of the cadavers, commemorative activities for the donors, etc.

11. What influenced you to decide to donate?

Answer: \_\_\_\_\_

12. Can you describe the process by which you moved from coming up with the idea of donating to finally registering as a volunteer? (What was the decisive motivation?)

Answer: \_\_\_\_\_

13. Have you met any opposition during your registration? Who did it come from?

Answer: \_\_\_\_\_

### Part 3 – Understanding of the donation program

14. Do you know the conditions, methods, and procedures involved in the body donation program in China?

Answer: \_\_\_\_\_

15. Have you participated in any activities after joining the Friends of Voluntary Body Donors (FVBD)?

---

No. ☐ ☐

Answer: \_\_\_\_\_

16. Have you ever been to the medical school where you will donate to in the future?

Answer: \_\_\_\_\_

17. Are you satisfied with the medical school's work on promoting the memorial activities for donors?

Answer: \_\_\_\_\_

18. Do you have any suggestions for the donation work?

Answer: \_\_\_\_\_
